# Supplementary material for: Structure of human spermine oxidase in complex with a highly selective allosteric inhibitor
Source: PubMed Central journal article supplement (PMC9355956; doi:10.1038/s42003-022-03735-9), 2022-08-05

Openlynx Report - jllaveri

Vnumber:jllaveri\_858\_1#1-1  
Vial:4:9  
Instrument:XEVO-G2SQTOF#NotSet

Report:jllaveri  
Date:30-Jun-2022  
Method:C:\MassLynx\2BEH\_TOF\_P5 @S7010S7037.olp

Description:  
Time:12:26:44

Printed: Thu Jun 30 13:56:59 2022

4: UV Detector: TAC :Wavelength Range: (200 - 450)

1.015e+1  
Range: 1.819e+1

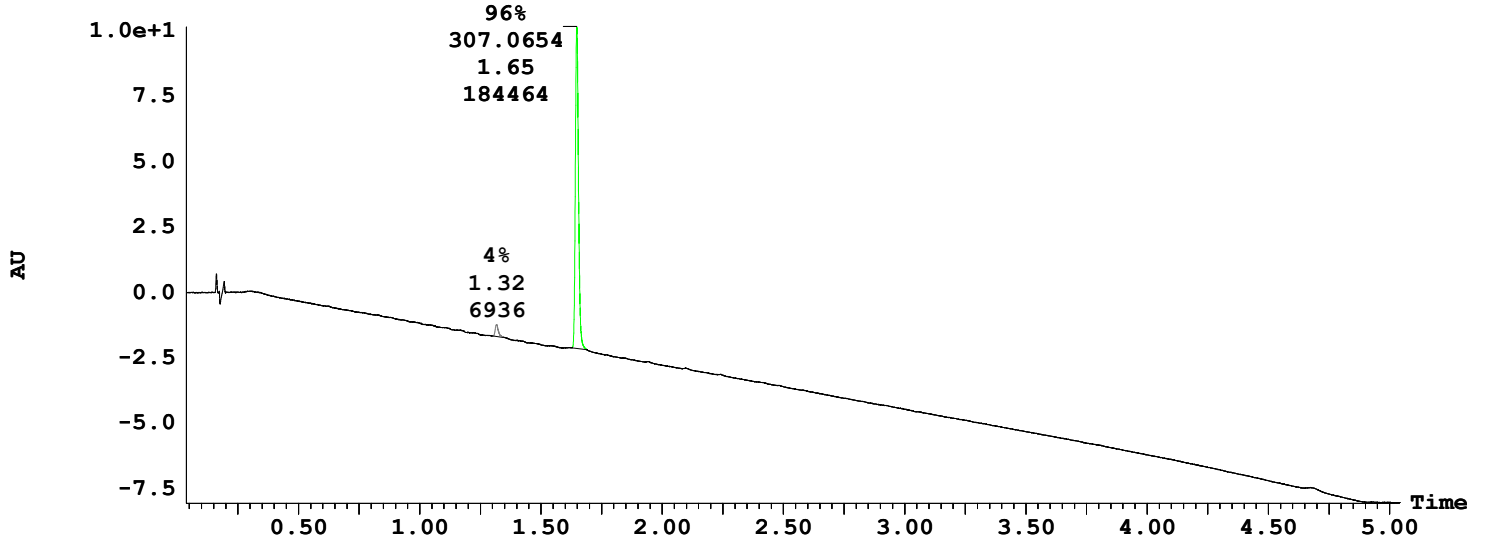

| Peak Number | Time | State | Area %Total | Mass Found     | AreaAbs |
|-------------|------|-------|-------------|----------------|---------|
| 2           | 1.32 |       | 3.62        |                | 6936    |
| 3           | 1.65 | OK    | 96.38       | 308.07, 308.07 | 184464  |

1: TOF MS ES+ :TIC Smooth (SG, 2x2)

9.5e+005

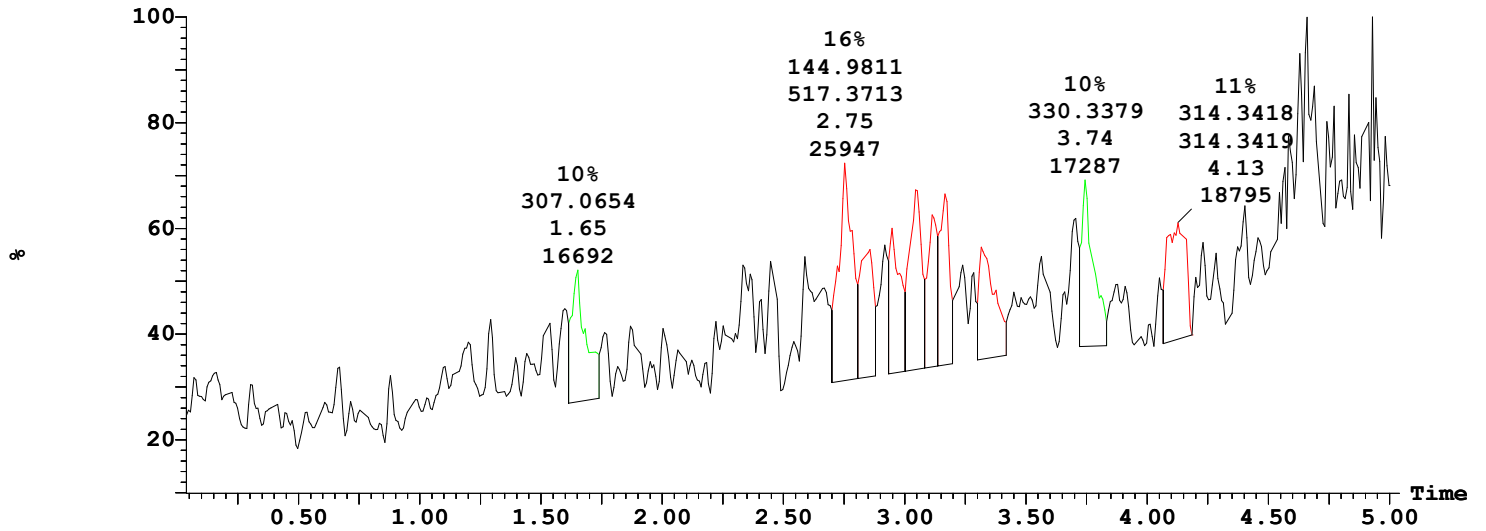

Openlynx Report - jllaveri

Vnumber:jllaveri\_858\_1#1-1  
Vial:4:9  
Instrument:XEVO-G2SQTOF#NotSet

Report:jllaveri  
Date:30-Jun-2022  
Method:C:\MassLynx\2BEH\_TOF\_P5 @S7010S7037.olp

Description:  
Time:12:26:44

Printed: Thu Jun 30 13:56:59 2022

2: TOF MS ES+ :TIC Smooth (SG, 2x2)

8.4e+005

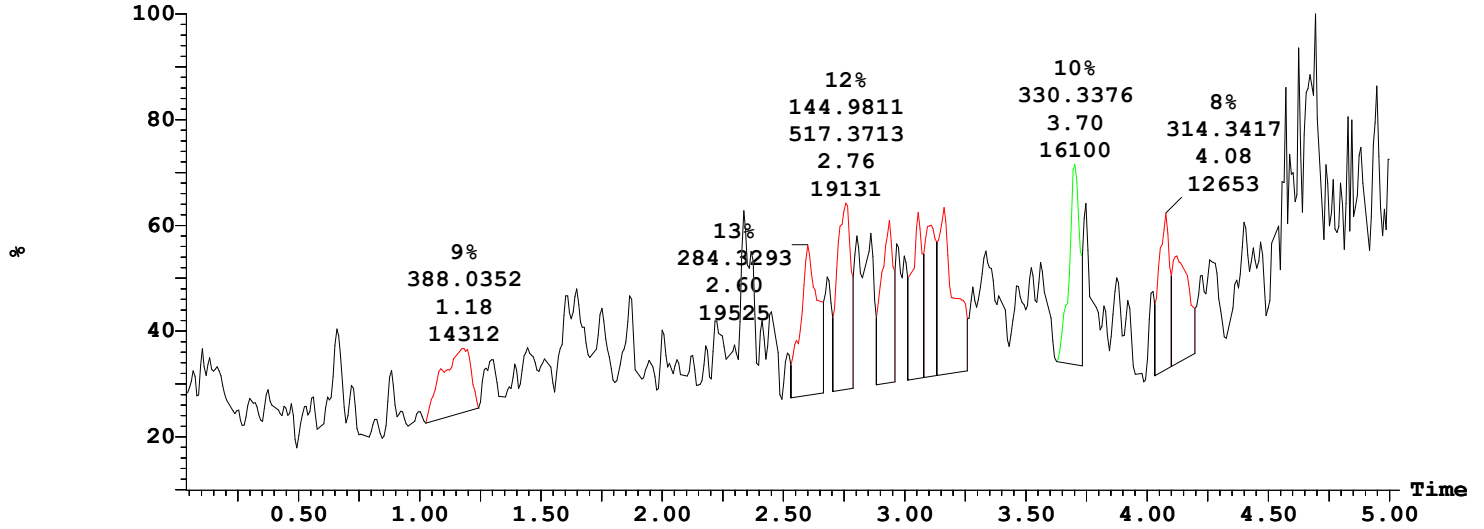

| Peak ID | Time | Mass found    | BPM   | State |
|---------|------|---------------|-------|-------|
| 3       | 1.65 | 309.08,309.08 | 307.1 | OK    |

3: (Time: 1.65) Combine (189:195) 1:TOF MS ES+ 4.2e+005

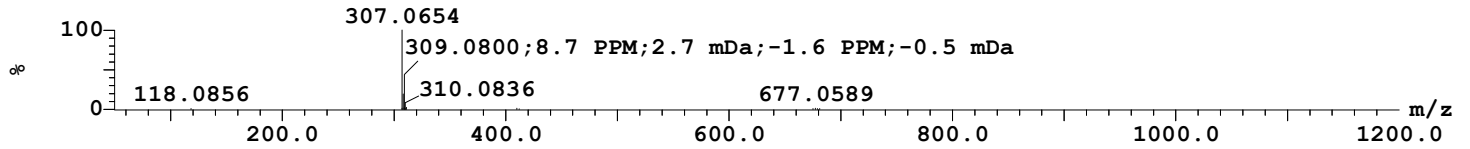

| Peak ID | Time | Mass found | BPM   | State          |
|---------|------|------------|-------|----------------|
| 6       | 2.86 | Not Found  | 258.3 | Diversity fail |

6: (Time: 2.86) Combine (331:335) 1:TOF MS ES+ 1.6e+004

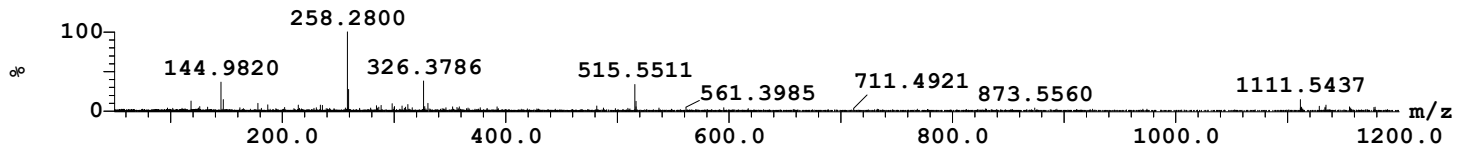

| Peak ID | Time | Mass found | BPM   | State          |
|---------|------|------------|-------|----------------|
| 7       | 2.95 | Not Found  | 326.4 | Diversity fail |

7: (Time: 2.95) Combine (341:347) 1:TOF MS ES+ 7.3e+004

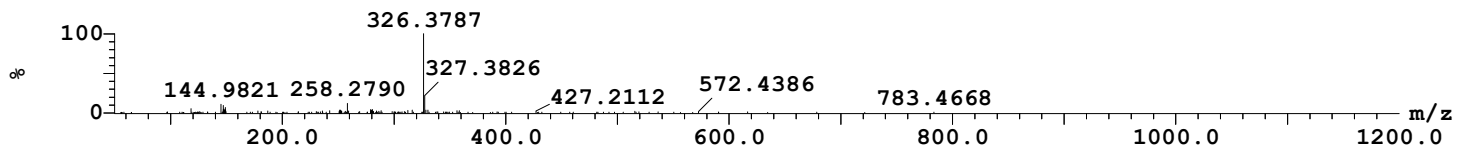

Openlynx Report - jllaveri

Vnumber:jllaveri\_858\_1#1-1  
Vial:4:9  
Instrument:XEVO-G2SQTOF#NotSet

Report:jllaveri  
Date:30-Jun-2022  
Method:C:\MassLynx\2BEH\_TOF\_P5 @S7010S7037.olg

Description:  
Time:12:26:44

Printed: Thu Jun 30 13:56:59 2022

| Peak ID | Time | Mass found | BPM   | State          |
|---------|------|------------|-------|----------------|
| 8       | 3.04 | Not Found  | 326.4 | Diversity fail |

8: (Time: 3.04) Combine (353:357) 1:TOF MS ES+ 3.0e+004

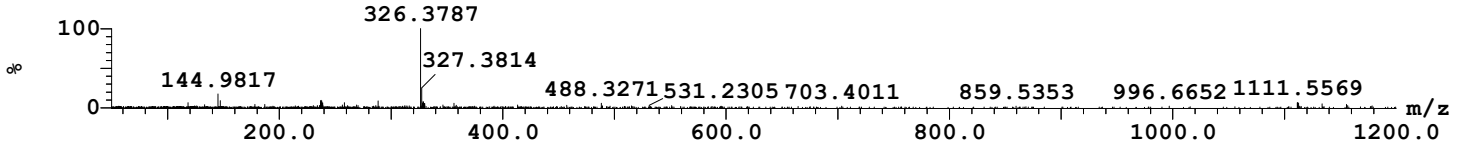

| Peak ID | Time | Mass found | BPM   | State          |
|---------|------|------------|-------|----------------|
| 9       | 3.11 | Not Found  | 326.4 | Diversity fail |

9: (Time: 3.11) Combine (360:366) 1:TOF MS ES+ 3.3e+004

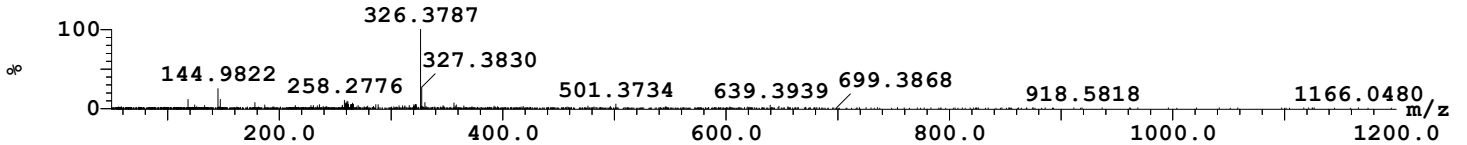

| Peak ID | Time | Mass found | BPM   | State          |
|---------|------|------------|-------|----------------|
| 10      | 3.17 | Not Found  | 326.4 | Diversity fail |

10: (Time: 3.17) Combine (367:373) 1:TOF MS ES+ 2.8e+004

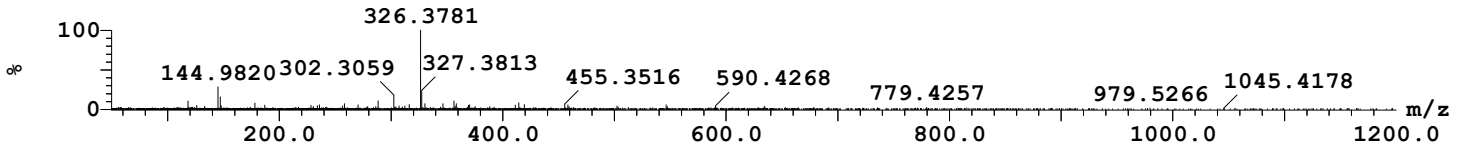

| Peak ID | Time | Mass found                              | BPM   | State |
|---------|------|-----------------------------------------|-------|-------|
| 13      | 3.74 | 9.08,331.06,350.10,309.08,331.06,350.11 | 330.3 | OK    |

13: (Time: 3.74) Combine (435:440) 1:TOF MS ES+ 3.7e+004

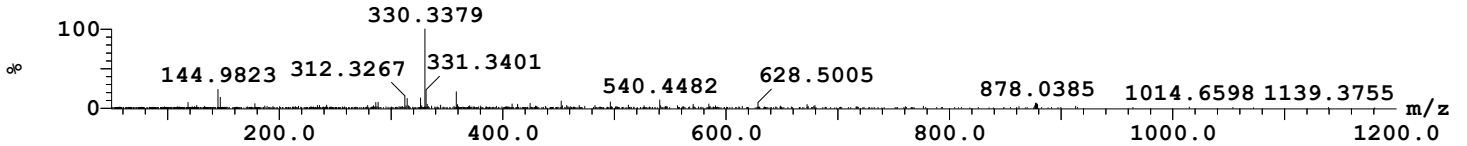

| Peak ID | Time | Mass found | BPM   | State          |
|---------|------|------------|-------|----------------|
| 15      | 4.13 | Not Found  | 314.3 | Diversity fail |

15: (Time: 4.13) Combine (480:484) 1:TOF MS ES+ 9.8e+003

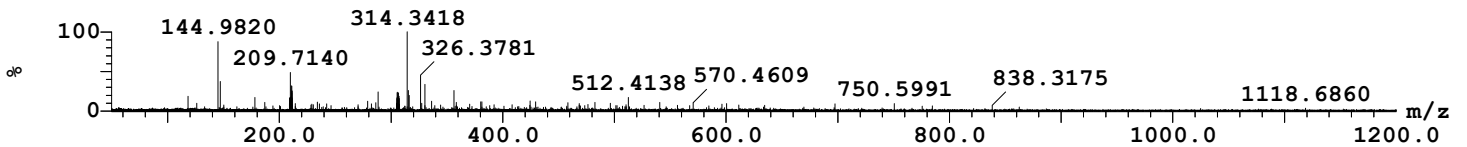

Openlynx Report - jllaveri

Vnumber:jllaveri\_858\_1#1-1  
Vial:4:9  
Instrument:XEVO-G2SQTOF#NotSet

Report:jllaveri  
Date:30-Jun-2022  
Method:C:\MassLynx\2BEH\_TOF\_P5 @S7010S7037.olg

Description:  
Time:12:26:44

Printed: Thu Jun 30 13:56:59 2022

| Peak ID | Time | Mass found | BPM   | State          |
|---------|------|------------|-------|----------------|
| 7       | 2.95 | Not Found  | 326.4 | Diversity fail |

7: (Time: 2.94) Combine (339:345) 2:TOF MS ES+ 3.3e+004

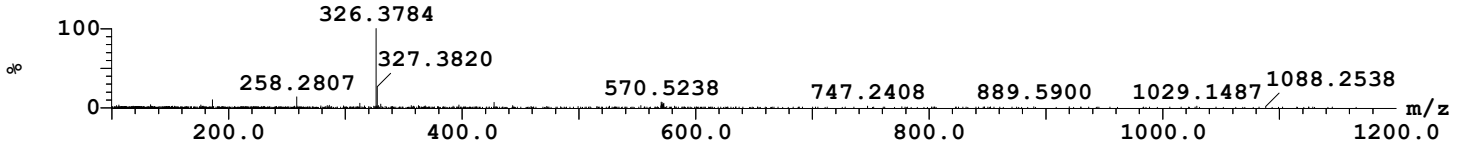

| Peak ID | Time | Mass found | BPM   | State          |
|---------|------|------------|-------|----------------|
| 8       | 3.04 | Not Found  | 326.4 | Diversity fail |

8: (Time: 3.06) Combine (353:358) 2:TOF MS ES+ 2.1e+004

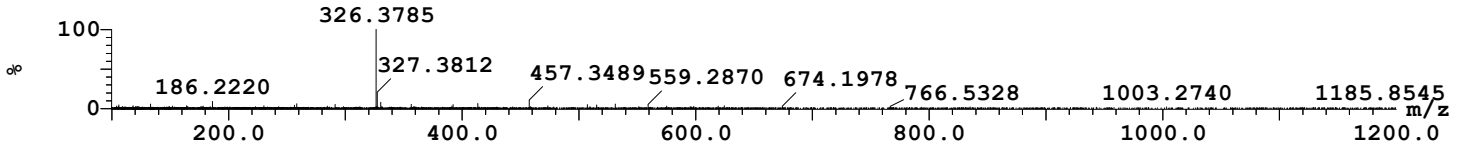

| Peak ID | Time | Mass found | BPM   | State          |
|---------|------|------------|-------|----------------|
| 9       | 3.11 | Not Found  | 326.4 | Diversity fail |

9: (Time: 3.11) Combine (359:365) 2:TOF MS ES+ 2.0e+004

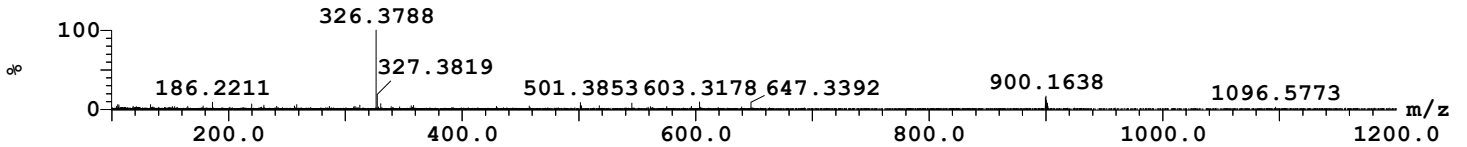

| Peak ID | Time | Mass found | BPM   | State          |
|---------|------|------------|-------|----------------|
| 10      | 3.17 | Not Found  | 326.4 | Diversity fail |

10: (Time: 3.16) Combine (366:372) 2:TOF MS ES+ 1.7e+004

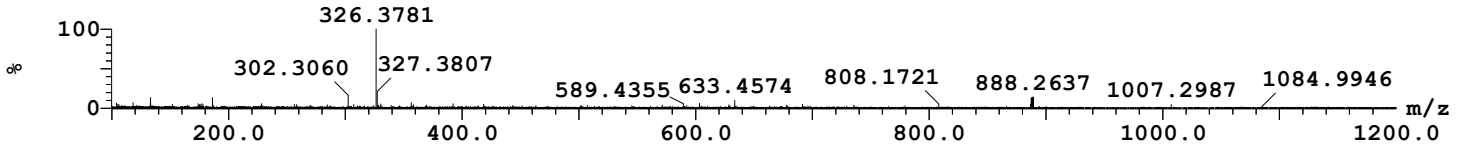

| Peak ID | Time | Mass found                            | BPM   | State |
|---------|------|---------------------------------------|-------|-------|
| 12      | 3.70 | 10,617.15,309.08,331.06,350.11,617.15 | 330.3 | OK    |

12: (Time: 3.70) Combine (429:435) 2:TOF MS ES+ 1.2e+004

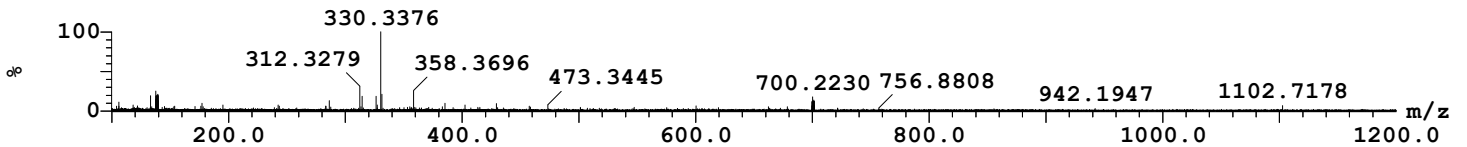

Supplement: 42003_2022_3735_MOESM4_ESM.pdf [file 42003_2022_3735_MOESM4_ESM.pdf]
