# Supplementary material for: Structure of human spermine oxidase in complex with a highly selective allosteric inhibitor
Source: PubMed Central journal article supplement (PMC9355956; doi:10.1038/s42003-022-03735-9), 2022-08-05
Supplement: 42003_2022_3735_MOESM3_ESM.pdf [file 42003_2022_3735_MOESM3_ESM.pdf]

## Description of Additional Supplementary Files

**File name:** Supplementary Data

**Description:** High-resolution mass spectrometry data.
